# Supplementary material
Source: ML conference proceedings conference paper supplement (https://openaccess.thecvf.com/content/ICCV_2019/html/Oh_Video_Object_Segmentation_ICCV_2019_paper.html)
Supplement: Supplementary file 2 [file Oh_Video_Object_Segmentation_ICCV_2019_supplemental.zip]

Archive with 5 entries (4 files):
- Comparisons_DAVIS.mp4
- __MACOSX/
- __MACOSX/._Comparisons_DAVIS.mp4
- 2838-supp.pdf
- __MACOSX/._2838-supp.pdf
